# Supplementary material for: Nature and determinants of social actions during a mass shooting
Source: PLoS One. 2021 Dec 7;16(12):e0260392. doi: 10.1371/journal.pone.0260392 (PMC8651140; doi:10.1371/journal.pone.0260392)
Supplement: S1 File — (XLSX) [file pone.0260392.s001.xlsx]

## Sheet: Sheet1
No	Item	Guide questions/description	Our study
Domain 1: Research team and reflexivity
Personal Characteristics
1.	Interviewer/facilitator	Which author/s conducted the interview or focus group?	mentioned
2.	Credentials	What were the researcher's credentials? E.g. PhD, MD	mentioned
3.	Occupation	What was their occupation at the time of the study?	mentioned
4.	Gender	Was the researcher male or female?	mentioned
5.	Experience and training	What experience or training did the researcher have?	mentioned for the main interviewers
Relationship with participants
6.	Relationship established	Was a relationship established prior to study commencement?	mentioned
7.	Participant knowledge of the interviewer	What did the participants know about the researcher? e.g. personal goals, reasons for doing the research	mentioned
8.	Interviewer characteristics	What characteristics were reported about the interviewer/facilitator? e.g. Bias, assumptions, reasons and interests in the research topic	not systematically recorded
Domain 2: study design
Theoretical framework
9.	Methodological orientation and Theory	What methodological orientation was stated to underpin the study? e.g. grounded theory, discourse analysis, ethnography, phenomenology, content analysis	the methodology is explained in details
Participant selection
10.	Sampling	How were participants selected? e.g. purposive, convenience, consecutive, snowball	mentioned
11.	Method of approach	How were participants approached? e.g. face-to-face, telephone, mail, email	mentioned
12.	Sample size	How many participants were in the study?	mentioned
13.	Non-participation	How many people refused to participate or dropped out? Reasons?	mentioned
Setting
14.	Setting of data collection	Where was the data collected? e.g. home, clinic, workplace	mentioned
15.	Presence of non-participants	Was anyone else present besides the participants and researchers?	mentioned
16.	Description of sample	What are the important characteristics of the sample? e.g. demographic data, date	mentioned
Data collection
17.	Interview guide	Were questions, prompts, guides provided by the authors? Was it pilot tested?	mentioned
18.	Repeat interviews	Were repeat interviews carried out? If yes, how many?	mentioned
19.	Audio/visual recording	Did the research use audio or visual recording to collect the data?	mentioned
20.	Field notes	Were field notes made during and/or after the interview or focus group?	mentioned
21.	Duration	What was the duration of the interviews or focus group?	mentioned
22.	Data saturation	Was data saturation discussed?	not applicable
23.	Transcripts returned	Were transcripts returned to participants for comment and/or correction?	not applicable
Domain 3: analysis and findingsz
Data analysis
24.	Number of data coders	How many data coders coded the data?	mentioned
25.	Description of the coding tree	Did authors provide a description of the coding tree?	mentioned
26.	Derivation of themes	Were themes identified in advance or derived from the data?	mentioned
27.	Software	What software, if applicable, was used to manage the data?	not applicable
28.	Participant checking	Did participants provide feedback on the findings?	no feedback that directly affected our manuscript
Reporting
29.	Quotations presented	Were participant quotations presented to illustrate the themes / findings? Was each quotation identified? e.g. participant number	provided, following revisions
30.	Data and findings consistent	Was there consistency between the data presented and the findings?	inter-reliability tests + inclusion of how many respondent reported each type of action
31.	Clarity of major themes	Were major themes clearly presented in the findings?	yes
32.	Clarity of minor themes	Is there a description of diverse cases or discussion of minor themes?	not applicable
